# Supplementary material
Source: PubMed Central journal article supplement (PMC7946566)
Supplement: mmc1.pdf [file mmc1.pdf]

# THE LANCET

## Child & Adolescent Health

### Supplementary appendix

This appendix formed part of the original submission and has been peer reviewed. We post it as supplied by the authors.

Supplement to: Bhopal SS, Bagaria J, Olabi B, Bhopal R. Children and young people remain at low risk of COVID-19 mortality. *Lancet Child Adolesc Health* 2021; published online March 10. [http://dx.doi.org/10.1016/S2352-4642\(21\)00066-3](http://dx.doi.org/10.1016/S2352-4642(21)00066-3).

**This online publication has been corrected. The corrected version first appeared at [thelancet.com/child-adolescent](http://thelancet.com/child-adolescent) on March 24, 2021.**

**Appendix to:**

**Children & young people remain at low risk from Covid-19 mortality**

**Lancet Child & Adolescent Health**

Sunil S Bhopal<sup>1</sup>, Jayshree Bagaria<sup>2</sup>, Bayanne Olabi<sup>3</sup>, Raj Bhopal<sup>4</sup>

<sup>1</sup>Population Health Sciences Institute, Newcastle University, UK

<sup>2</sup>Independent Consultant, Edinburgh, UK

<sup>3</sup>Biosciences Institute, Newcastle University, UK

<sup>4</sup>Usher Institute, University of Edinburgh, UK

|                |        | Population         | All Cause deaths |             | Unintentional injury deaths |             | LRTI deaths |             | COVID-19 deaths |             | COVID-19 deaths as % of all deaths |
|----------------|--------|--------------------|------------------|-------------|-----------------------------|-------------|-------------|-------------|-----------------|-------------|------------------------------------|
|                |        |                    | n                | per 100,000 | n                           | per 100,000 | n           | per 100,000 | n               | per 100,000 |                                    |
| USA            | 0-4y   | 19,810,275         | 23844            | 120.36      | 1913                        | 9.66        | 584         | 2.95        | 67              | 0.34        | 0.28%                              |
|                | 5-14y  | 41,075,169         | 4990             | 12.15       | 710                         | 1.73        | 129         | 0.31        | 67              | 0.16        | 1.34%                              |
| United Kingdom | 0-9y   | 8,052,552          | 3793             | 47.10       | 125                         | 1.55        | 124         | 1.54        | 7               | 0.09        | 0.18%                              |
|                | 10-19y | 7,528,144          | 1109             | 14.73       | 96                          | 1.28        | 22          | 0.29        | 22              | 0.29        | 1.98%                              |
| Italy          | 0-9y   | 5,090,482          | 1569             | 30.83       | 61                          | 1.19        | 39          | 0.76        | 8               | 0.16        | 0.51%                              |
|                | 10-19y | 5,768,874          | 772              | 13.38       | 72                          | 1.26        | 11          | 0.19        | 10              | 0.17        | 1.30%                              |
| Germany        | 0-9y   | 7,588,635          | 2782             | 36.66       | 132                         | 1.74        | 50          | 0.65        | 9               | 0.12        | 0.32%                              |
|                | 10-19y | 7,705,657          | 1249             | 16.21       | 88                          | 1.14        | 18          | 0.24        | 4               | 0.05        | 0.32%                              |
| Spain          | 0-9y   | 4,370,858          | 1369             | 31.31       | 72                          | 1.64        | 33          | 0.76        | 8               | 0.18        | 0.58%                              |
|                | 10-19y | 4,883,447          | 532              | 10.89       | 55                          | 1.13        | 9           | 0.19        | 18              | 0.37        | 3.39%                              |
| France         | 0-9y   | 7,755,755          | 2916             | 37.60       | 213                         | 2.74        | 46          | 0.59        | 7               | 0.09        | 0.24%                              |
|                | 10-19y | 8,328,988          | 1068             | 12.82       | 106                         | 1.28        | 11          | 0.13        | 4               | 0.05        | 0.37%                              |
| Korea          | 0-9y   | 4,148,654          | 1519             | 36.61       | 142                         | 3.42        | 36          | 0.86        | 0               | 0.00        | 0.00%                              |
|                | 10-19y | 4,940,455          | 814              | 16.48       | 76                          | 1.54        | 10          | 0.20        | 0               | 0.00        | 0.00%                              |
| <b>TOTAL</b>   |        | <b>137,047,945</b> | 48,326           | 35.26       | 3,860                       | 2.82        | 1,121       | 0.82        | 231             | 0.17        | 0.48%                              |

**Supplementary table 1: Age-specific data for seven countries showing population, estimated deaths from all and specific causes over approximately 11 months, compared with COVID-19 deaths from the beginning of the COVID-19 pandemic to between 20 Jan 2020 and 11 Feb 2021 (see note 3)**

**Notes:**

1. Population: collated from national statistical agencies by The Demographics of COVID-19 Deaths, National Institute for Demographic Studies (INED). Available online: <https://dc-covid.site.ined.fr/en/>
2. All cause deaths, unintentional injury deaths, LRTI deaths: Calculated from Global Burden of Disease estimates. Available online: <http://ghdx.healthdata.org/gbd-2017>
3. COVID-19 Deaths: Collated from national statistical agencies by The Demographics of COVID-19 Deaths, National Institute for Demographic Studies (INED). Available online: <https://dc-covid.site.ined.fr/en/> includes deaths reported up to: 3 February 2021 (USA), 29 January 2021 (United Kingdom), 20 January 2021 (Italy), 9 February 2021 (Germany), 10 February 2021 (Spain), 11 February 2021 (France), 3 February 2021 (Korea).

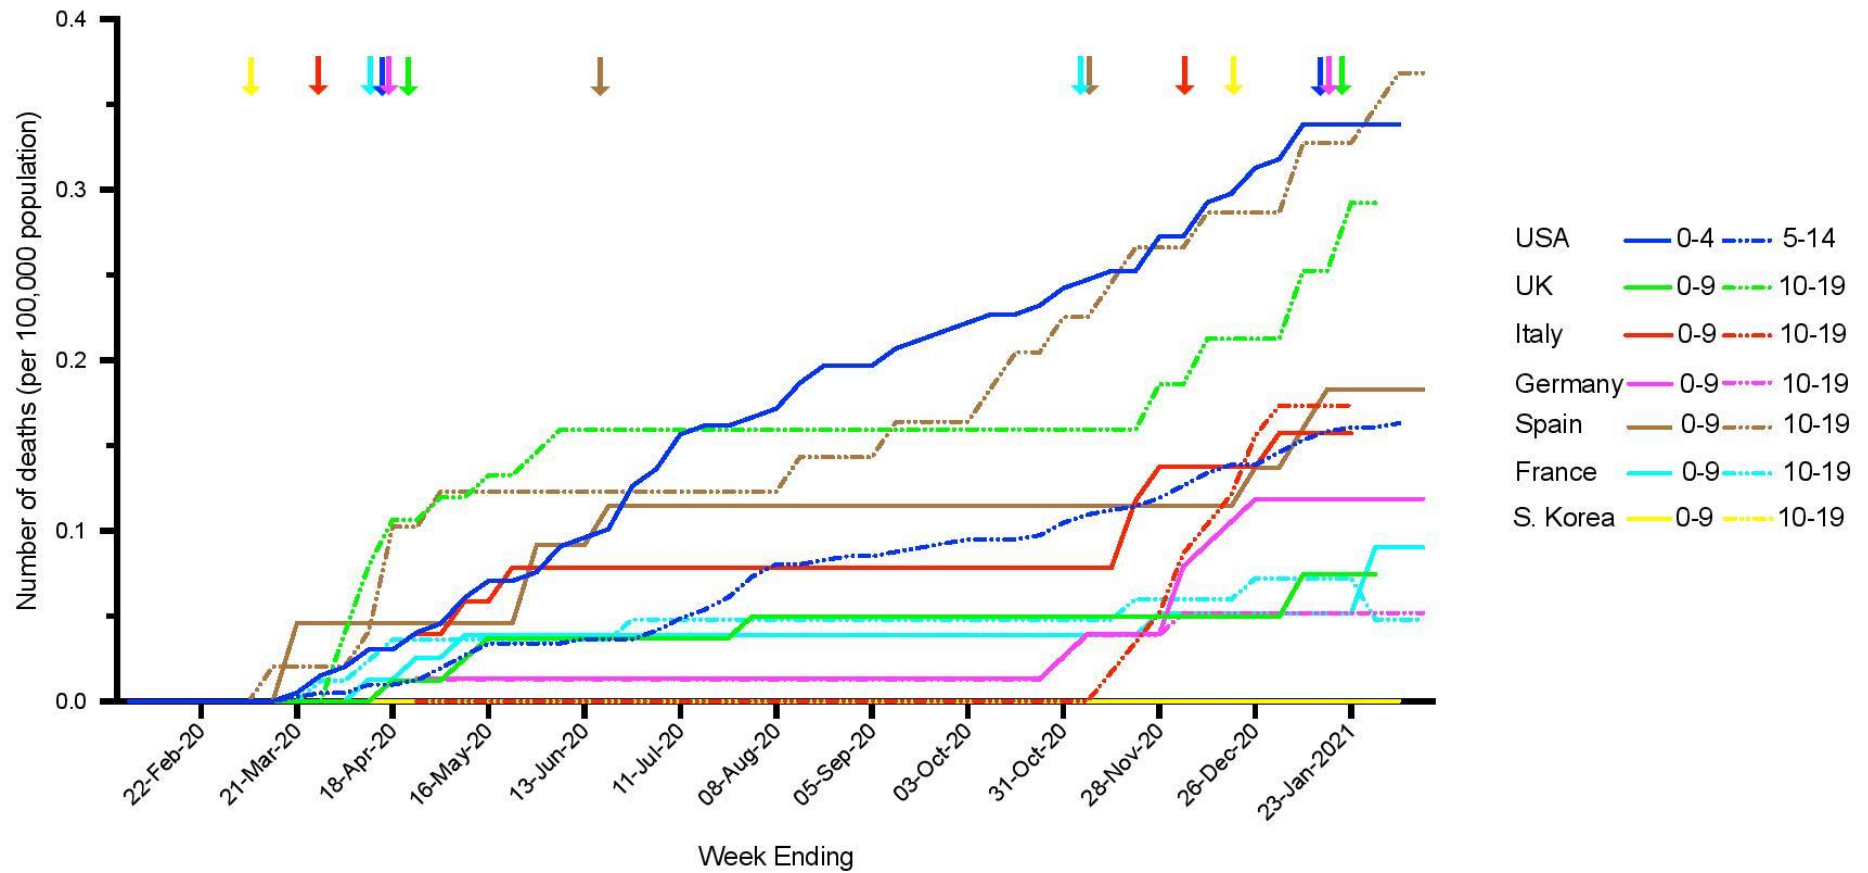

**Supplementary Figure 1: Trends of child mortality from Covid-19 in seven countries between 20 Jan 2020 and 11 Feb 2021. Data displayed for age groups 0-9 and 10-19 years (0-4 and 5-14 for USA). Arrows denote date of peak all-age reported mortality per day from COVID-19 for each country. Notes:**

1. Population: collated from national statistical agencies by The Demographics of COVID-19 Deaths, National Institute for Demographic Studies (INED). Available online: <https://dc-covid.site.ined.fr/en/>
2. COVID-19 Deaths: Collated from national statistical agencies by The Demographics of COVID-19 Deaths, National Institute for Demographic Studies (INED). Available online: <https://dc-covid.site.ined.fr/en/> includes deaths reported up to: 3 February 2021 (USA), 29 January 2021 (United Kingdom), 20 January 2021 (Italy), 9 February 2021 (Germany), 10 February 2021 (Spain), 11 February 2021 (France), 3 February 2021 (Korea).
